# Supplementary material for: Chemical Modification of Auranofin Yields a New Family of Anticancer Drug Candidates: The Gold(I) Phosphite Analogues
Source: MDPI journal article supplement (doi:10.3390/molecules28031050), 2023-01-20
Supplement: s1 [file s1]

# Chemical modification of auranofin yields a new family of anticancer drug candidates: the gold(I) Phosphite analogues

Damiano Cirri, Andrea Geri, Lara Massai, Michele Mannelli, Tania Gamberi, Chiara Gabbiani, Francesca Magherini, Matteo Becatti, Alessandro Pratesi and Luigi Messori

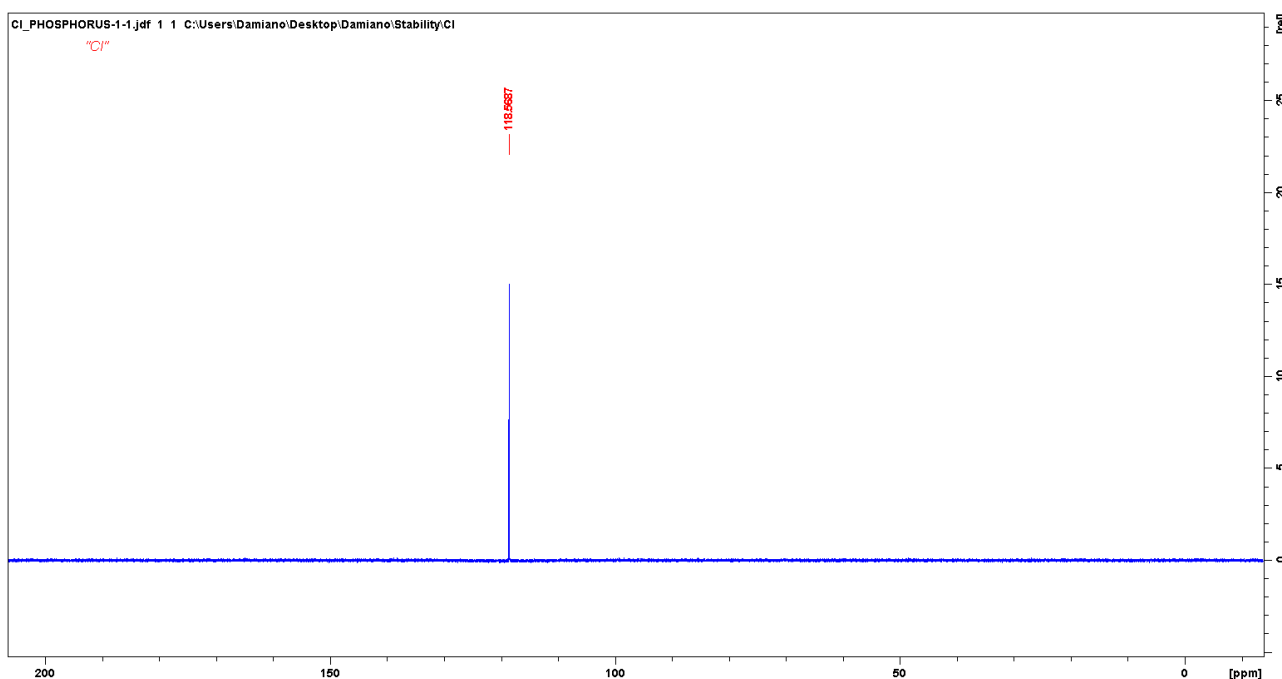

Figure S1:  $^{31}\text{P}$ NMR spectrum performed at  $t_0$  on  $\text{AuP}(\text{OCH}_3)_3\text{Cl}$ . Solvent:  $\text{MeOD-d}_4/\text{H}_2\text{O}$  1:1

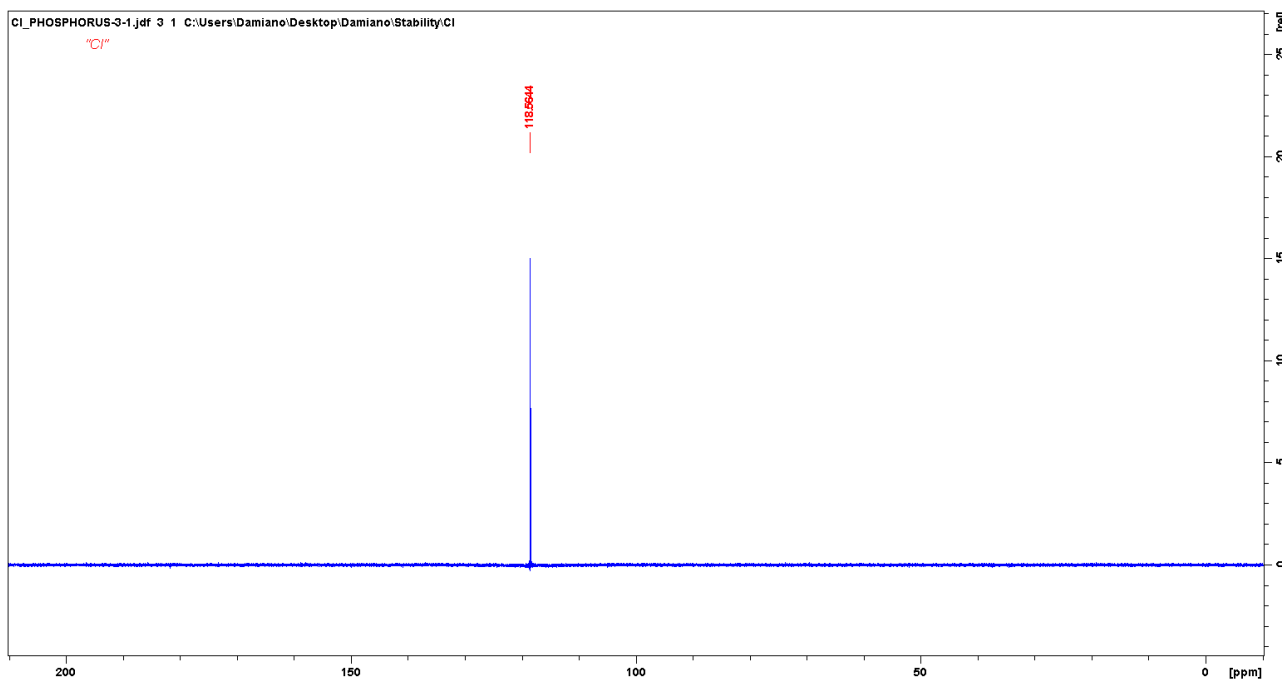

Figure S2:  $^{31}\text{P}$ NMR spectrum performed at 72h on  $\text{AuP}(\text{OCH}_3)_3\text{Cl}$ . Solvent:  $\text{MeOD-d}_4/\text{H}_2\text{O}$  1:1

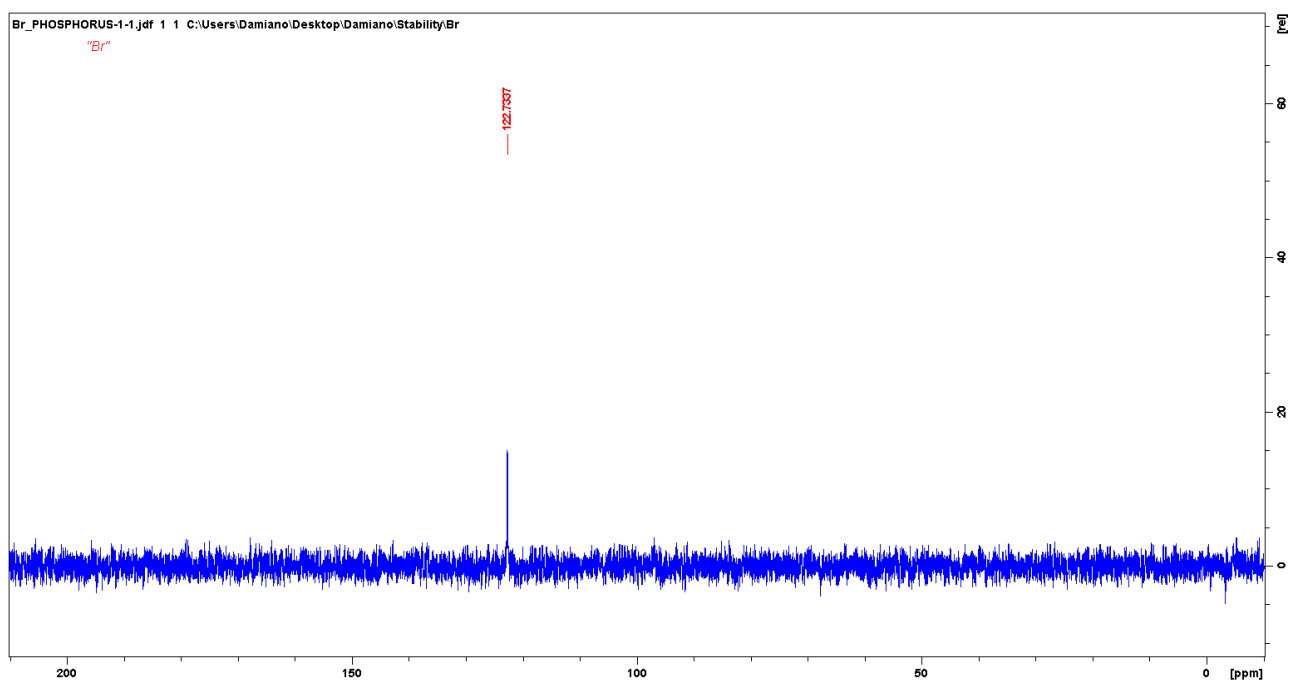

Figure S3:  $^{31}\text{P}$ NMR spectrum performed at  $t_0$  on  $\text{AuP}(\text{OCH}_3)_3\text{Br}$ . Solvent:  $\text{MeOD-d}_4/\text{H}_2\text{O}$  1:1

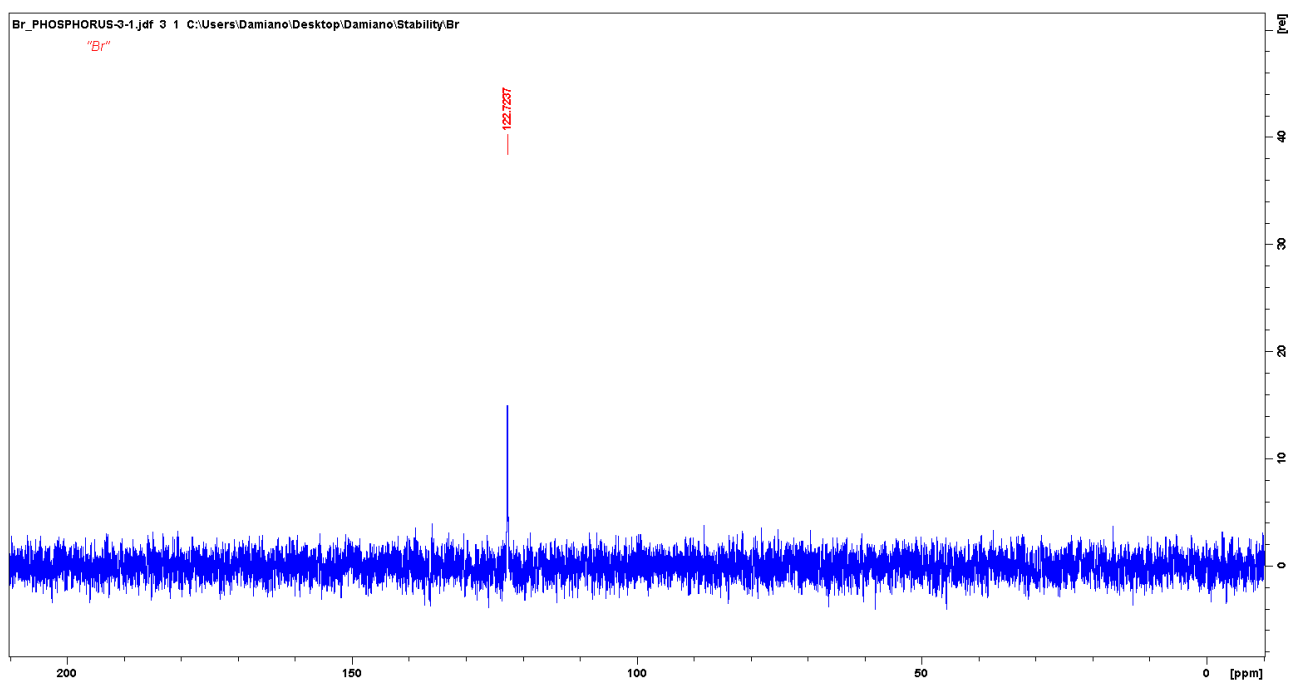

Figure S4:  $^{31}\text{P}$ NMR spectrum performed at 72h on  $\text{AuP}(\text{OCH}_3)_3\text{Br}$ . Solvent:  $\text{MeOD-d}_4/\text{H}_2\text{O}$  1:1

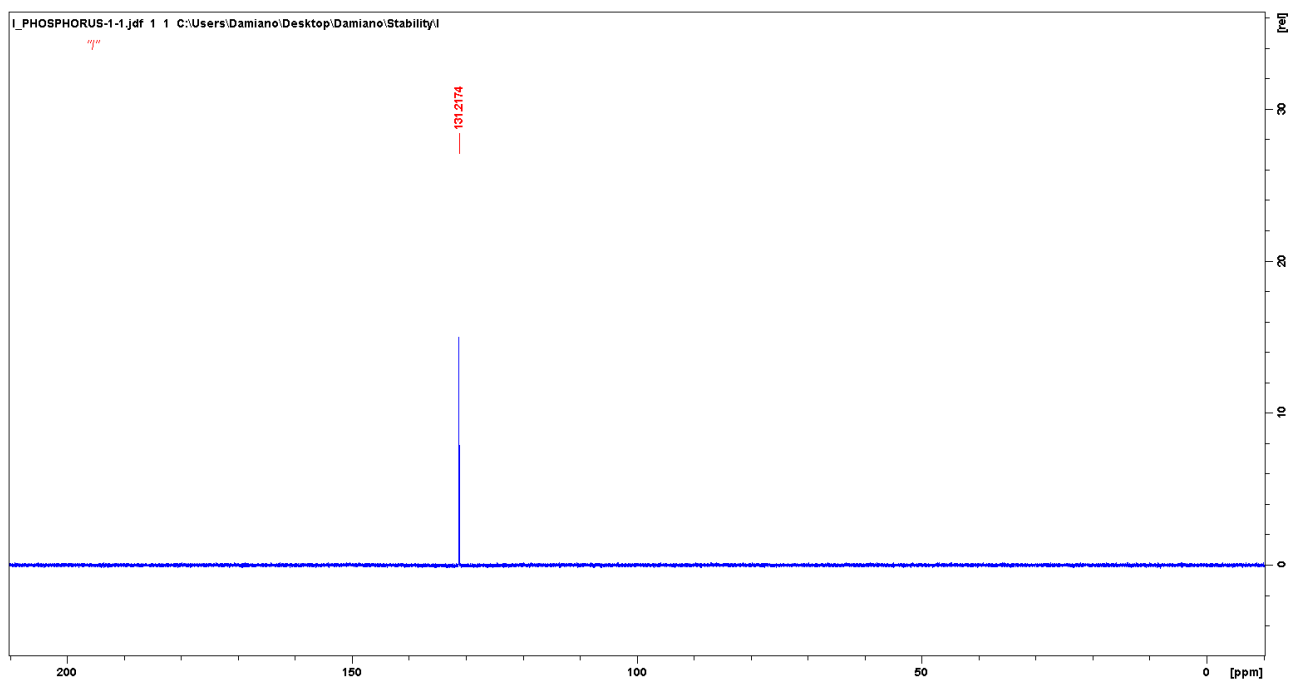

Figure S5:  $^{31}\text{P}$ NMR spectrum performed at  $t_0$  on  $\text{AuP}(\text{OCH}_3)_3\text{I}$ . Solvent:  $\text{MeOD-d}_4/\text{H}_2\text{O}$  1:1

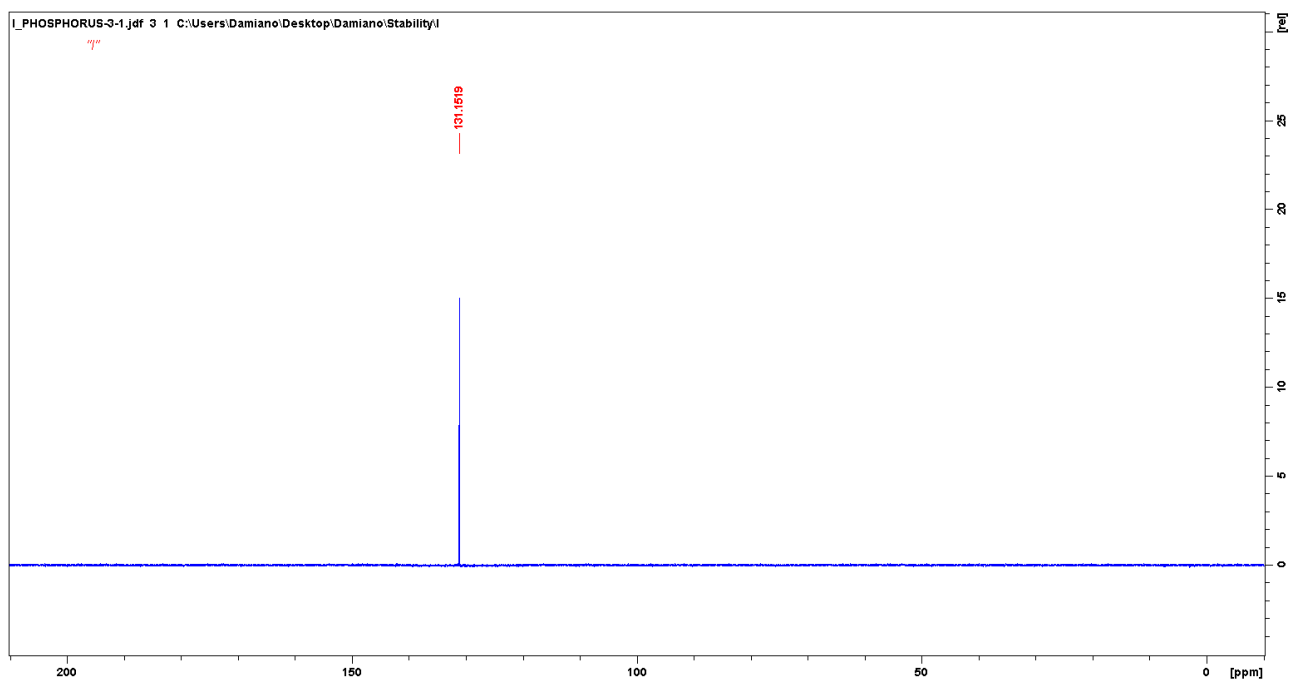

Figure S6:  $^{31}\text{P}$ NMR spectrum performed at 72h on  $\text{AuP}(\text{OCH}_3)_3\text{I}$ . Solvent:  $\text{MeOD-d}_4/\text{H}_2\text{O}$  1:1

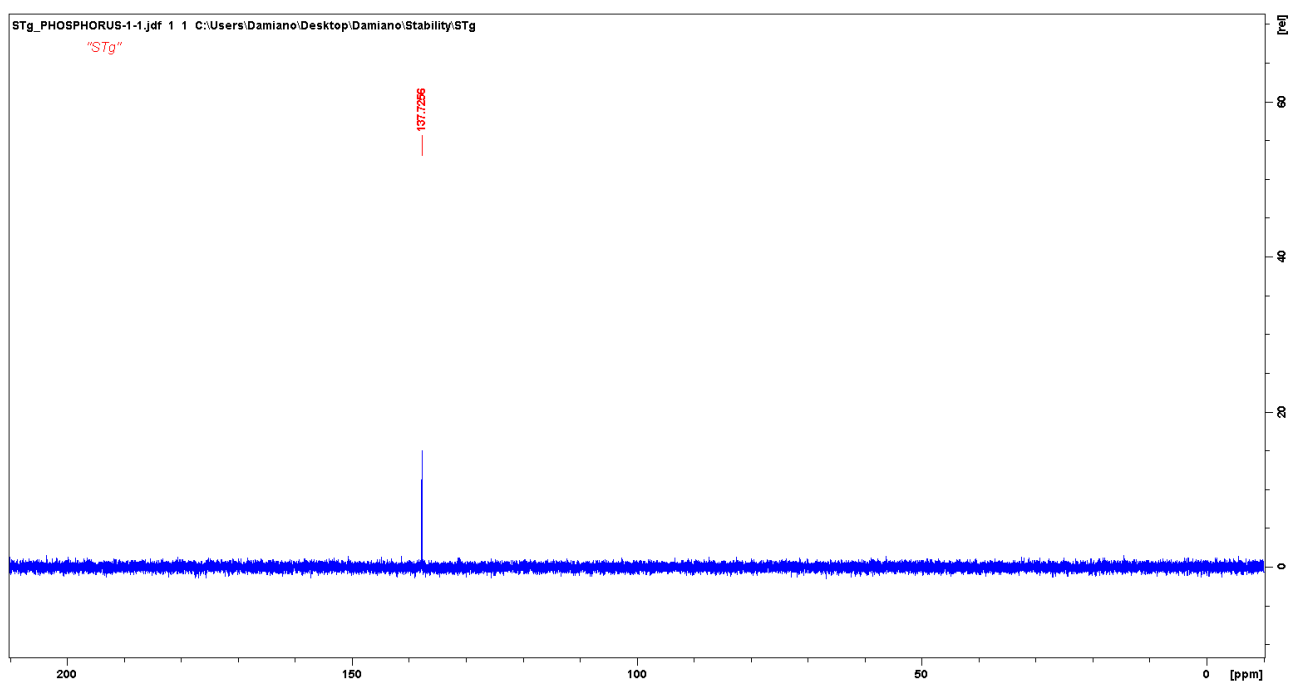

Figure S7:  $^{31}\text{P}$ NMR spectrum performed at  $t_0$  on  $\text{AuP}(\text{OCH}_3)_3\text{STga}$ . Solvent:  $\text{MeOD-d}_4/\text{H}_2\text{O}$  1:1

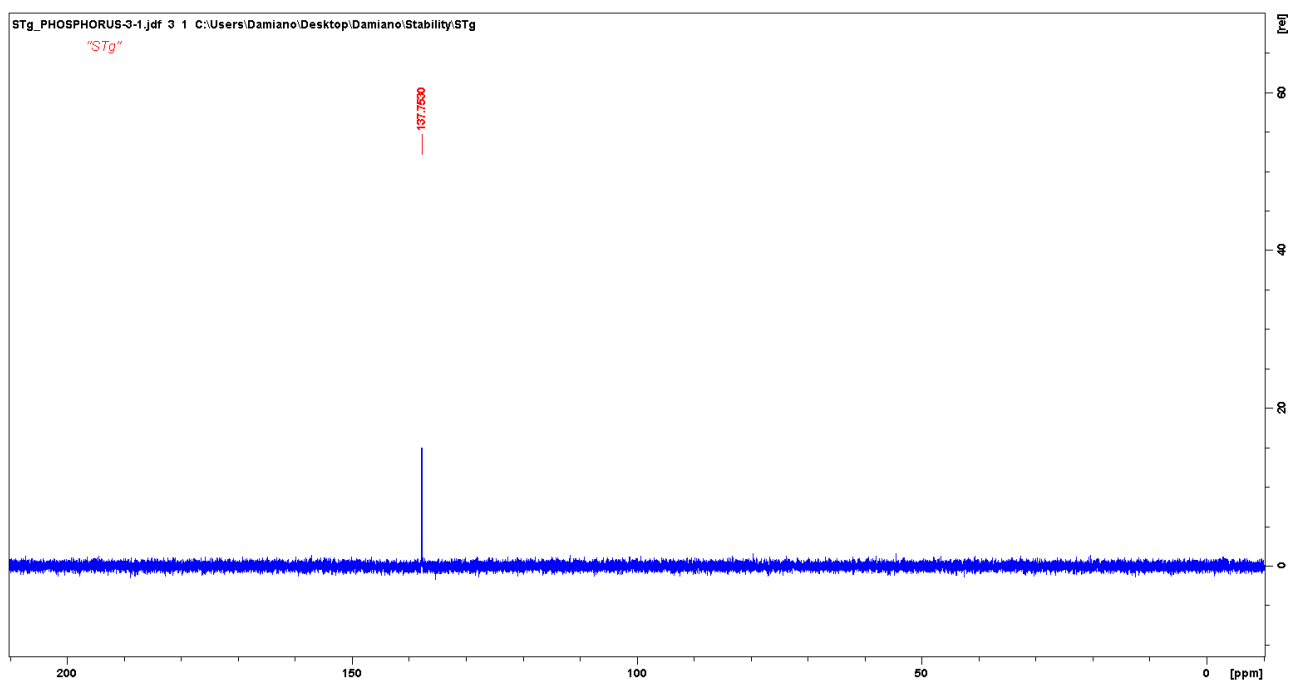

Figure S8:  $^{31}\text{P}$ NMR spectrum performed at 72h on  $\text{AuP}(\text{OCH}_3)_3\text{STga}$ . Solvent:  $\text{MeOD-d}_4/\text{H}_2\text{O}$  1:1

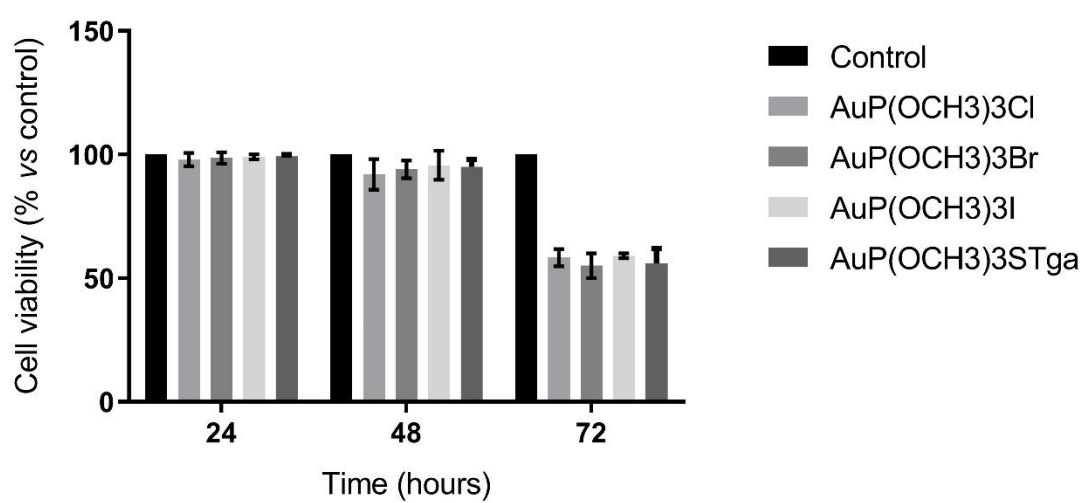

Figure S9: Cell Viability Assay. MTT time course assay at 24, 48, and 72 h of drug exposure by using their 72-h exposure IC<sub>50</sub> doses.
